# Supplementary material
Source: MDPI journal article supplement (https://www.mdpi.com/2073-4395/11/11/2177)
Supplement: s1 [file s1]

**Table S1.** List of top 10 genus that contributed to QS functional genes using PICRUSt2.

| <b>Taxonomy Contributions</b>                     | <b>C10 (%)</b> |
|---------------------------------------------------|----------------|
| Pseudomonas                                       | 33.78103154    |
| Escherichia-Shigella                              | 5.482468212    |
| Sphingomonas                                      | 5.031100347    |
| Bifidobacterium                                   | 4.574227996    |
| Bacteroides                                       | 3.759564045    |
| Blautia                                           | 3.374250014    |
| Catenibacterium                                   | 3.16507954     |
| Massilia                                          | 2.928386635    |
| o__Acidobacteriales; f__uncultured; g__uncultured | 2.779765509    |
| Enterococcus                                      | 2.510045687    |
|                                                   | <b>C12 (%)</b> |
| Pseudomonas                                       | 37.68856567    |
| Bifidobacterium                                   | 6.382978723    |
| Sphingomonas                                      | 5.454277431    |
| f__Comamonadaceae;NA                              | 5.390398506    |
| Catenibacterium                                   | 4.161957643    |
| Massilia                                          | 4.009630976    |
| Bacteroides                                       | 3.626357427    |
| o__Acidobacteriales; f__uncultured; g__uncultured | 2.859810329    |
| Blautia                                           | 2.515846887    |
| Bacillus                                          | 1.916367746    |
|                                                   | <b>C8 (%)</b>  |
| Pseudomonas                                       | 35.58993282    |
| Bifidobacterium                                   | 7.342227268    |
| Bacteroides                                       | 5.643864131    |
| Catenibacterium                                   | 4.626738575    |
| Sphingomonas                                      | 3.798845681    |
| f__Comamonadaceae;NA                              | 3.742075882    |
| Blautia                                           | 3.694767717    |
| Massilia                                          | 3.6900369      |
| Polaromonas                                       | 2.838489923    |
| Variovorax                                        | 1.717286404    |
|                                                   | <b>BS (%)</b>  |
| Pseudomonas                                       | 32.15302952    |
| Bifidobacterium                                   | 8.842568617    |
| Catenibacterium                                   | 7.651475919    |
| Bacteroides                                       | 6.54453651     |
| Massilia                                          | 3.845157949    |

|                                                   |              |
|---------------------------------------------------|--------------|
| Blautia                                           | 3.010098395  |
| Variovorax                                        | 3.010098395  |
| Bacillus                                          | 2.492232004  |
| Sphingomonas                                      | 1.851372346  |
| o__Acidobacteriales; f__uncultured; g__uncultured | 1.728379078  |
|                                                   | <b>W (%)</b> |
| Pseudomonas                                       | 29.83806618  |
| Bifidobacterium                                   | 7.81976062   |
| Catenibacterium                                   | 6.233278573  |
| Bacteroides                                       | 5.862473598  |
| Blautia                                           | 4.125792068  |
| Massilia                                          | 3.431119456  |
| f__Comamonadaceae;NA                              | 2.52522882   |
| Variovorax                                        | 2.520535086  |
| Escherichia-Shigella                              | 2.271767191  |
| Sphingomonas                                      | 2.098099038  |
